# Supplementary material
Source: MDPI journal article supplement (https://www.mdpi.com/2297-8739/10/2/92)
Supplement: s1 [file s1]

## Supplementary Material

# **Trend of Antioxidant Activity and Total Phenolic Content in Wild Pabular Plants as Part of the Environmental Quality Assessment of Some Areas in the Central Italy**

Ivan Notardonato <sup>1</sup>, Francesca Fantasma <sup>2</sup>, Pamela Monaco <sup>2</sup>, Cristina Di Fiore <sup>1</sup>, Gabriella Saviano <sup>2</sup>, Carmen Giancola <sup>3</sup>, Pasquale Avino <sup>1,\*</sup> and Vincenzo De Felice<sup>2</sup>

<sup>1</sup> Department of Agriculture, Environmental and Food Sciences, University of Molise, Via De Sanctis, I-86100 Campobasso, Italy

<sup>2</sup> Department of Biosciences and Territory, University of Molise, C. da Fonte Lappone, I-86090 Pesche, Italy

<sup>3</sup> Consorzio del Giardino della Flora Appenninica, I-86062 Capracotta, Italy

\* Correspondence: avino@unimol.it; Tel.: +39-0874-404634

**Table S1.** Total phenol content in wild pabular plants harvested in the four study areas investigated during the three sampling periods. Results are expressed as mg GAE g<sup>-1</sup> DM  $\pm$  SD, where DM is dry matter and SD is standard deviation; n.a. means that the sample was not available.

| Plant Species                     | Sampling I       | Sampling II      | Sampling III    |
|-----------------------------------|------------------|------------------|-----------------|
| <b>MONTEFORTE</b>                 |                  |                  |                 |
| <i>Trifolium pratense</i>         | 9.27 $\pm$ 2.62  | n.a.             | 5.23 $\pm$ 0.08 |
| <i>Scorzonera laciniata</i>       | 2.73 $\pm$ 0.11  | n.a.             | n.a.            |
| <i>Bromus erectus</i>             | 7.09 $\pm$ 0.74  | 2.84 $\pm$ 0.07  | 2.30 $\pm$ 0.03 |
| <i>Centaurea ambigua</i>          | n.a.             | 1.57 $\pm$ 0.13  | n.a.            |
| <i>Festuca circummediterranea</i> | n.a.             | 3.52 $\pm$ 0.18  | 0.76 $\pm$ 0.05 |
| <b>VERRINO</b>                    |                  |                  |                 |
| <i>Medicago lupulina</i>          | 2.84 $\pm$ 0.08  | n.a.             | n.a.            |
| <i>Lotus corniculatus</i>         | 6.74 $\pm$ 1.21  | n.a.             | n.a.            |
| <i>Thymus longicaulis</i>         | 14.37 $\pm$ 0.35 | 17.03 $\pm$ 0.30 | 4.32 $\pm$ 0.10 |
| <i>Festuca circummediterranea</i> | n.a.             | 3.98 $\pm$ 0.08  | 1.02 $\pm$ 0.01 |
| <i>Dorycnium pentaphyllum</i>     | n.a.             | 2.79 $\pm$ 0.22  | n.a.            |
| <i>Trifolium pratense</i>         | n.a.             | n.a.             | 5.30 $\pm$ 0.20 |
| <b>GUARDATA</b>                   |                  |                  |                 |
| <i>Trifolium pratense</i>         | 7.92 $\pm$ 0.64  | 7.45 $\pm$ 0.42  | 5.06 $\pm$ 0.37 |
| <i>Festuca circummediterranea</i> | 3.26 $\pm$ 0.52  | 2.01 $\pm$ 0.01  | 0.99 $\pm$ 0.05 |
| <i>Dactylis glomerata</i>         | 3.49 $\pm$ 1.15  | 7.59 $\pm$ 0.21  | 2.93 $\pm$ 0.06 |
| <b>GUADO CANNAVINA</b>            |                  |                  |                 |
| <i>Hippocrepis comosa</i>         | 9.75 $\pm$ 0.23  | 4.15 $\pm$ 0.04  | 1.29 $\pm$ 0.12 |
| <i>Festuca circummediterranea</i> | 2.80 $\pm$ 0.21  | 3.33 $\pm$ 0.23  | 1.24 $\pm$ 0.06 |
| <i>Dactylis glomerata</i>         | 4.83 $\pm$ 0.78  | 7.82 $\pm$ 0.44  | 2.93 $\pm$ 0.33 |

**Table S2.** Total tannin content in wild pabular plants harvested in the four study areas investigated during the three sampling periods. Results are expressed as mg TAE g<sup>-1</sup> DM± SD, where DM is dry matter and SD is standard deviation; n.a. means that the sample was not available.

| Plant Species                     | Sampling I | Sampling II | Sampling III |
|-----------------------------------|------------|-------------|--------------|
| <b>MONTEFORTE</b>                 |            |             |              |
| <i>Trifolium pratense</i>         | 10.62±0.08 | n.a.        | 5.11±0.04    |
| <i>Scorzonera laciniata</i>       | 2.68±0.13  | n.a.        | n.a.         |
| <i>Bromus erectus</i>             | 6.97±0.5   | 2.68±0.23   | 1.98±0.05    |
| <i>Centaurea ambigua</i>          | n.a.       | 1.41±0.35   | n.a.         |
| <i>Festuca circummediterranea</i> | n.a.       | 3.14±0.23   | 0.55±0.05    |
| <b>VERRINO</b>                    |            |             |              |
| <i>Medicago lupulina</i>          | 2.81±0.14  | n.a.        | n.a.         |
| <i>Lotus corniculatus</i>         | 5.63±0.38  | n.a.        | n.a.         |
| <i>Thymus longicaulis</i>         | 14.09±0.15 | 15.50±0.05  | 2.93±0.06    |
| <i>Festuca circummediterranea</i> | n.a.       | 3.69±0.17   | 0.68±0.05    |
| <i>Dorycnium pentaphyllum</i>     | n.a.       | 2.77±0.37   | n.a.         |
| <i>Trifolium pratense</i>         | n.a.       | n.a.        | 3.99±0.23    |
| <b>GUARDATA</b>                   |            |             |              |
| <i>Trifolium pratense</i>         | 8.10±0.60  | 5.57±0.31   | 4.09±0.21    |
| <i>Festuca circummediterranea</i> | 2.80±0.32  | 1.84±0.05   | 0.80±0.03    |
| <i>Dactylis glomerata</i>         | 2.61±0.31  | 6.77±0.27   | 1.95±0.47    |
| <b>GUADO CANNAVINA</b>            |            |             |              |
| <i>Hippocrepis comosa</i>         | 9.12±0.24  | 3.87±0.41   | 0.78±0.13    |
| <i>Festuca circummediterranea</i> | 2.55±0.07  | 2.86±0.58   | 0.99±0.23    |
| <i>Dactylis glomerata</i>         | 4.13±0.19  | 6.64±0.34   | 2.06±0.14    |

**Table S3.** Condensed tannins content in wild pabular plants harvested in the four study areas investigated during the three sampling periods. Results are expressed as  $\mu\text{g mL}^{-1}$  of extract  $\pm$  standard deviation (SD); n.a. means that the sample was not available.

| Plant Species                     | Sampling I      | Sampling II      | Sampling III     |
|-----------------------------------|-----------------|------------------|------------------|
| <b>MONTEFORTE</b>                 |                 |                  |                  |
| <i>Trifolium pratense</i>         | 3.59 $\pm$ 0.14 | n.a.             | 10.51 $\pm$ 0.08 |
| <i>Scorzonera laciniata</i>       | 1.23 $\pm$ 0.08 | n.a.             | n.a.             |
| <i>Bromus erectus</i>             | 1.92 $\pm$ 0.22 | 0.13 $\pm$ 0.02  | 1.49 $\pm$ 0.03  |
| <i>Centaurea ambigua</i>          | n.a.            | 0.46 $\pm$ 0.03  | n.a.             |
| <i>Festuca circummediterranea</i> | n.a.            | 0.67 $\pm$ 0.13  | 1.74 $\pm$ 0.08  |
| <b>VERRINO</b>                    |                 |                  |                  |
| <i>Medicago lupulina</i>          | 2.44 $\pm$ 0.17 | n.a.             | n.a.             |
| <i>Lotus corniculatus</i>         | 6.03 $\pm$ 0.05 | n.a.             | n.a.             |
| <i>Thymus longicaulis</i>         | 0.85 $\pm$ 0.08 | 0.77 $\pm$ 0.07  | 1.33 $\pm$ 0.12  |
| <i>Festuca circummediterranea</i> | n.a.            | 0.63 $\pm$ 0.22  | 1.97 $\pm$ 0.18  |
| <i>Dorycnium pentaphyllum</i>     | n.a.            | 22.85 $\pm$ 0.10 | n.a.             |
| <i>Trifolium pratense</i>         | n.a.            | n.a.             | 2.82 $\pm$ 0.07  |
| <b>GUARDATA</b>                   |                 |                  |                  |
| <i>Trifolium pratense</i>         | 1.56 $\pm$ 0.06 | 3.33 $\pm$ 0.27  | 2.49 $\pm$ 0.31  |
| <i>Festuca circummediterranea</i> | 2.49 $\pm$ 0.12 | 0.77 $\pm$ 0.08  | 1.67 $\pm$ 0.32  |
| <i>Dactylis glomerata</i>         | 3.44 $\pm$ 0.14 | 2.03 $\pm$ 0.25  | 1.95 $\pm$ 0.08  |
| <b>GUADO CANNAVINA</b>            |                 |                  |                  |
| <i>Hippocrepis comosa</i>         | 0.95 $\pm$ 0.13 | 3.87 $\pm$ 0.33  | 1.64 $\pm$ 0.05  |
| <i>Festuca circummediterranea</i> | 0.67 $\pm$ 0.08 | 1.23 $\pm$ 0.17  | 1.21 $\pm$ 0.34  |
| <i>Dactylis glomerata</i>         | 2.49 $\pm$ 0.22 | 3.46 $\pm$ 0.43  | 1.87 $\pm$ 0.08  |

**Table S4.** Antioxidant activity of wild pabular plants investigated in the four study areas investigated during the three sampling periods. Results are expressed as IC<sub>50</sub> (mg mL<sup>-1</sup>) with related standard deviation (DS); n.a. means that the sample was not available.

| Plant Species                     | Sampling I | Sampling II | Sampling III |
|-----------------------------------|------------|-------------|--------------|
| <b>MONTEFORTE</b>                 |            |             |              |
| <i>Trifolium pratense</i>         | 1.73±0.28  | n.a.        | 1.02±0.09    |
| <i>Scorzonera laciniata</i>       | 2.43±0.75  | n.a.        | n.a.         |
| <i>Bromus erectus</i>             | 2.39±0.64  | 3.76±0.08   | 2.12±0.01    |
| <i>Centaurea ambigua</i>          | n.a.       | 8.76±0.13   | n.a.         |
| <i>Festuca circummediterranea</i> | n.a.       | 2.76±0.16   | 3.26±0.34    |
| <b>VERRINO</b>                    |            |             |              |
| <i>Medicago lupulina</i>          | 9.83±1.13  | n.a.        | n.a.         |
| <i>Lotus corniculatus</i>         | 3.02±0.93  | n.a.        | n.a.         |
| <i>Thymus longicaulis</i>         | 1.02±0.02  | 0.50±0.01   | 0.49±0.01    |
| <i>Festuca circummediterranea</i> | n.a.       | 3.92±0.76   | 2.84±0.11    |
| <i>Dorycnium pentaphyllum</i>     | n.a.       | 4.24±0.28   | n.a.         |
| <i>Trifolium pratense</i>         | n.a.       | n.a.        | 0.31±0.01    |
| <b>GUARDATA</b>                   |            |             |              |
| <i>Trifolium pratense</i>         | 3.18±0.87  | 0.89±0.30   | 0.41±0.01    |
| <i>Festuca circummediterranea</i> | 7.76±0.13  | 6.08±0.26   | 3.36±0.06    |
| <i>Dactylis glomerata</i>         | 7.69±2.68  | 0.95±0.09   | 0.79±0.03    |
| <b>GUADO CANNAVINA</b>            |            |             |              |
| <i>Hippocrepis comosa</i>         | 5.01±1.24  | 6.23±0.15   | 5.93±0.72    |
| <i>Festuca circummediterranea</i> | 8.39±0.67  | 4.60±0.11   | 2.60±0.05    |
| <i>Dactylis glomerata</i>         | 3.25±0.28  | 1.35±0.14   | 0.84±0.09    |

**Table S5.** Heavy metals concentrations in wild pabular plants analysed expressed as  $\mu\text{g g}^{-1}$  with standard deviation. Cd, Ni and Pb were below LODs values.

|              | Location        | Plant species                | Cu       | Zn       |
|--------------|-----------------|------------------------------|----------|----------|
| Sampling I   | Monteforte      | <i>T. pratense</i>           | 10.7±1.1 | 1.1±0.1  |
|              |                 | <i>S. laciniata</i>          | 8.1±1.0  | 1.4±0.1  |
|              |                 | <i>B. erectus</i>            | 4.6±0.2  | 3.5±0.3  |
|              | Verrino         | <i>M. lupulina</i>           | 2.3±0.3  | 6.2±0.8  |
|              |                 | <i>L. corniculatus</i>       | 3.1±0.3  | 5.2±0.5  |
|              |                 | <i>T. longicaulis</i>        | 3.0±0.4  | 8.3±1.1  |
|              | Guardata        | <i>T. pratense</i>           | 6.0±0.9  | 3.3±0.3  |
|              |                 | <i>F. circummediterranea</i> | 1.2±0.2  | 5.8±0.5  |
|              |                 | <i>D. glomerata</i>          | 2.0±0.3  | 3.1±0.3  |
|              | Guado Cannavina | <i>H. comosa</i>             | 5.5±0.6  | 4.1±0.7  |
|              |                 | <i>F. circummediterranea</i> | 2.3±0.1  | 2.4±0.2  |
|              |                 | <i>D. glomerata</i>          | 3.4±0.5  | 5.0±0.6  |
| Sampling II  | Monteforte      | <i>B. erectus</i>            | 1.5±0.3  | 7.6±0.8  |
|              |                 | <i>C. ambigua</i>            | 15.5±0.3 | 16.2±2.3 |
|              |                 | <i>F. circummediterranea</i> | 1.3±0.2  | 20.9±2.6 |
|              | Verrino         | <i>T. longicaulis</i>        | 16.1±0.5 | 16.5±2.1 |
|              |                 | <i>F. circummediterranea</i> | 12.9±1.0 | 9.4±1.5  |
|              |                 | <i>D. pentaphyllum</i>       | 18.1±0.6 | 19.5±2.9 |
|              | Guardata        | <i>T. pratense</i>           | 13.3±1.0 | 18.8±2.7 |
|              |                 | <i>D. glomerata</i>          | 3.1±0.3  | 17.3±1.4 |
|              |                 | <i>F. circummediterranea</i> | 1.4±0.2  | 12.1±1.1 |
|              | Guado Cannavina | <i>D. glomerata</i>          | 20.4±1.1 | 23.1±0.6 |
|              |                 | <i>F. circummediterranea</i> | 12.0±0.6 | 15.2±1.9 |
|              |                 | <i>H. comosa</i>             | 15.9±0.9 | 17.8±1.0 |
| Sampling III | Monteforte      | <i>T. pratense</i>           | 19.2±1.4 | 12.0±1.1 |
|              |                 | <i>B. erectus</i>            | 12.3±1.2 | 5.6±0.7  |
|              |                 | <i>F. circummediterranea</i> | 16.3±0.5 | 6.7±0.7  |
|              | Verrino         | <i>T. pratense</i>           | 20.1±0.9 | 11.1±1.7 |
|              |                 | <i>T. longicaulis</i>        | 18.0±0.6 | 16.3±1.3 |
|              |                 | <i>F. circummediterranea</i> | 11.0±0.3 | 13.3±2.0 |
|              | Guardata        | <i>T. pratense</i>           | 20.1±1.3 | 19.8±3.1 |
|              |                 | <i>F. circummediterranea</i> | 13.5±0.6 | 24.5±3.9 |
|              |                 | <i>D. glomerata</i>          | 16.5±0.7 | 17.4±2.7 |
|              | Guado Cannavina | <i>H. comosa</i>             | 13.1±0.9 | 26.5±2.3 |
|              |                 | <i>D. glomerata</i>          | 15.1±0.9 | 20.5±2.7 |
|              |                 | <i>F. circummediterranea</i> | 14.3±1.3 | 19.3±2.2 |

**Table S6.** Heavy metals concentrations in soil samples of areas analysed expressed as  $\mu\text{g g}^{-1}$  with standard deviation. Pb and Cd were below the LOD values.

| Area            | Cu             | Ni             | Zn             |
|-----------------|----------------|----------------|----------------|
| Monteforte      | 59.6 $\pm$ 0.8 | 36.3 $\pm$ 4.9 | 54.7 $\pm$ 5.3 |
| Verrino         | 26.2 $\pm$ 0.9 | 13.2 $\pm$ 0.8 | 40.2 $\pm$ 2.5 |
| Guardata        | 21.1 $\pm$ 0.3 | 14.5 $\pm$ 2.2 | 47.8 $\pm$ 7.4 |
| Guado Cannavina | 24.5 $\pm$ 1.6 | 24.0 $\pm$ 1.4 | 38.6 $\pm$ 5.8 |

**Figure S1.** Correlation between the antioxidant activity and the sampling period, considering the mean temperatures of each sampling time. Please note: the correlation has been evaluated only when plant species was present during all period of sampling. **a)** *B. erectus* collected from Monteforte; **b)** *T. longicaulis* collected from Verrino; **c)** *F. circummediterranea* collected from Guardata; **d)** *F. circummediterranea* collected from Guado Cannavina; For correlation value: see the text.

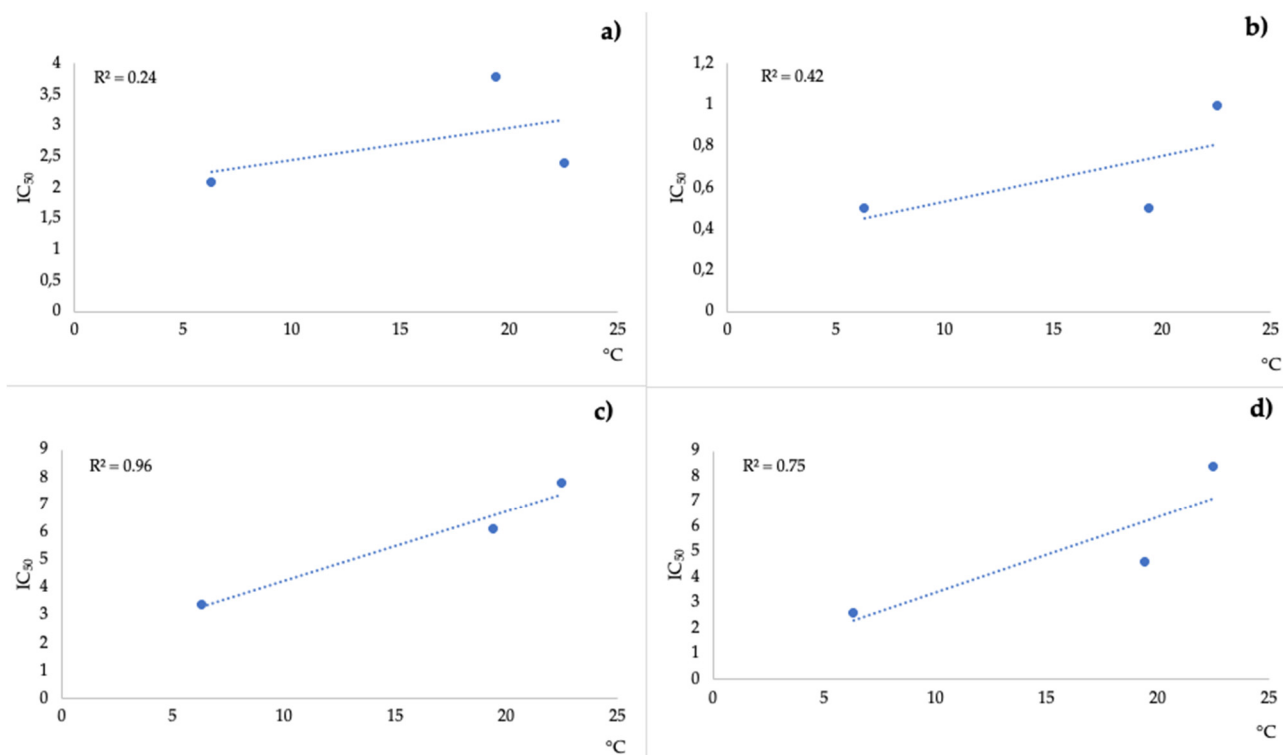



**Figure S2.** Correlation between the total polyphenols content and the sampling period, considering the mean temperatures of each sampling time. Please note: the correlation has been evaluated only when plant species was present during all period of sampling. **a)** *B. erectus* collected from Monteforte; **b)** *T. longicaulis* collected from Verrino; **c)** *F. circummediterranea* collected from Guardata; **d)** *F. circummediterranea* collected from Guado Cannavina; For correlation value: see the text.

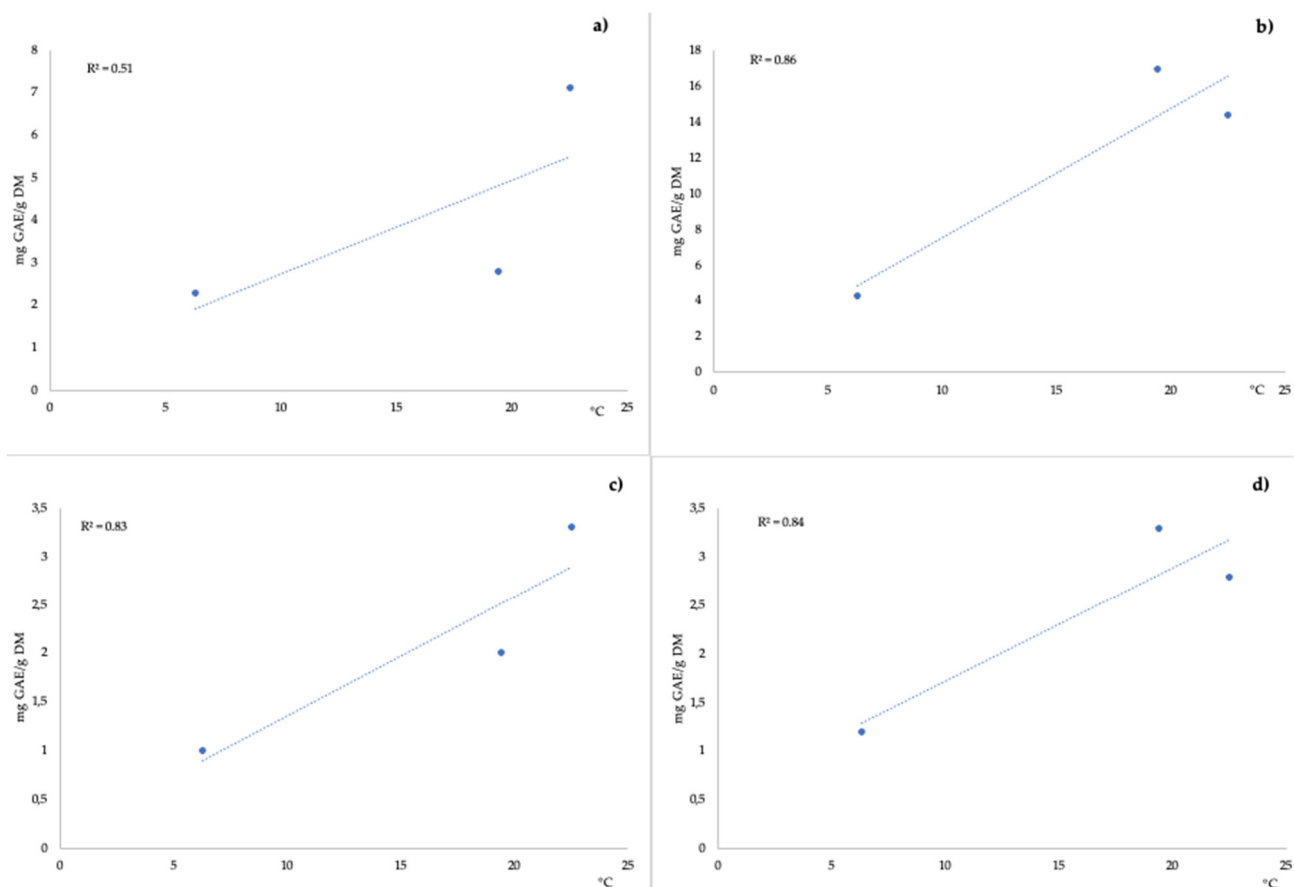

**Figure S3.** Correlation between the total tannins content and the sampling period, considering the mean temperatures of each sampling time. Please note: the correlation has been evaluated only when plant species was present during all period of sampling. **a)** *B. erectus* collected from Monteforte; **b)** *T. longicaulis* collected from Verrino; **c)** *F. circummediterranea* collected from Guardata; **d)** *F. circummediterranea* collected from Guado Cannavina; For correlation value: see the text.

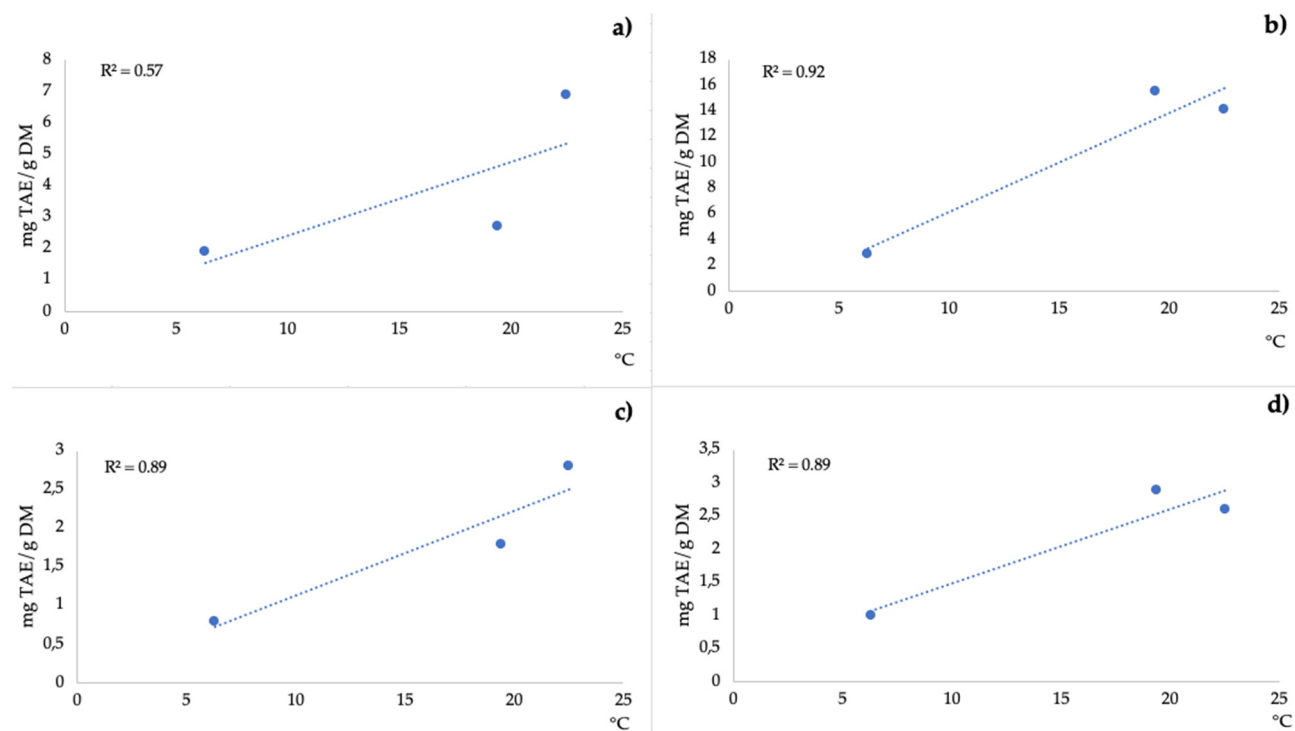

**Figure S4.** Correlation between the condensed tannins content and the sampling period, considering the mean temperatures of each sampling time. Please note: the correlation has been evaluated only when plant species was present during all period of sampling. **a)** *B. erectus* collected from Monteforte; **b)** *T. longicaulis* collected from Verrino; **c)** *F. circummediterranea* collected from Guardata; **d)** *F. circummediterranea* collected from Guado Cannavina; For correlation value: see the text.

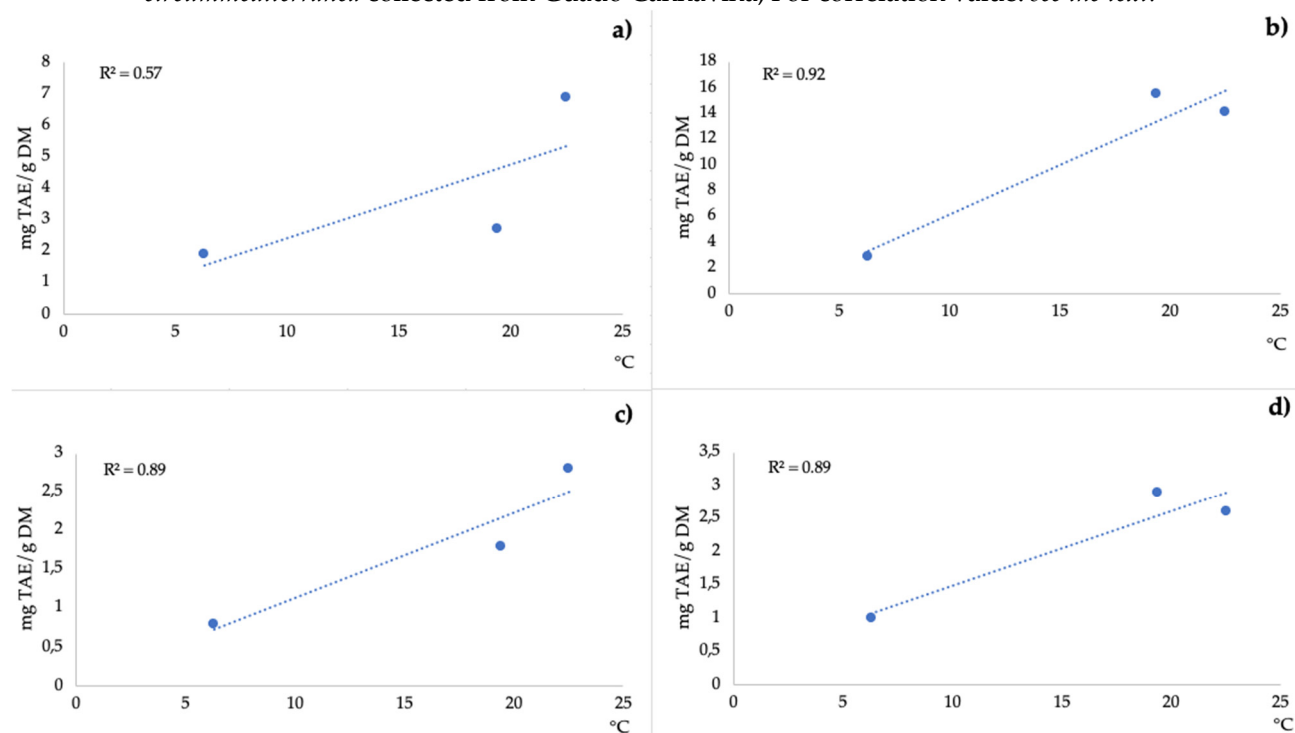

**Figure S5.** Correlation between the antioxidant activity and total polyphenols content of **a)** *B. erectus* collected from Monteforte; **b)** *T. longicaulis* collected from Verrino; **c)** *F. circummediterranea* collected from Guardata; **d)** *F. circummediterranea* collected from Guado Cannavina during all sampling periods. Correlation value (-0.25; 0.32; 0.97; 0.59).

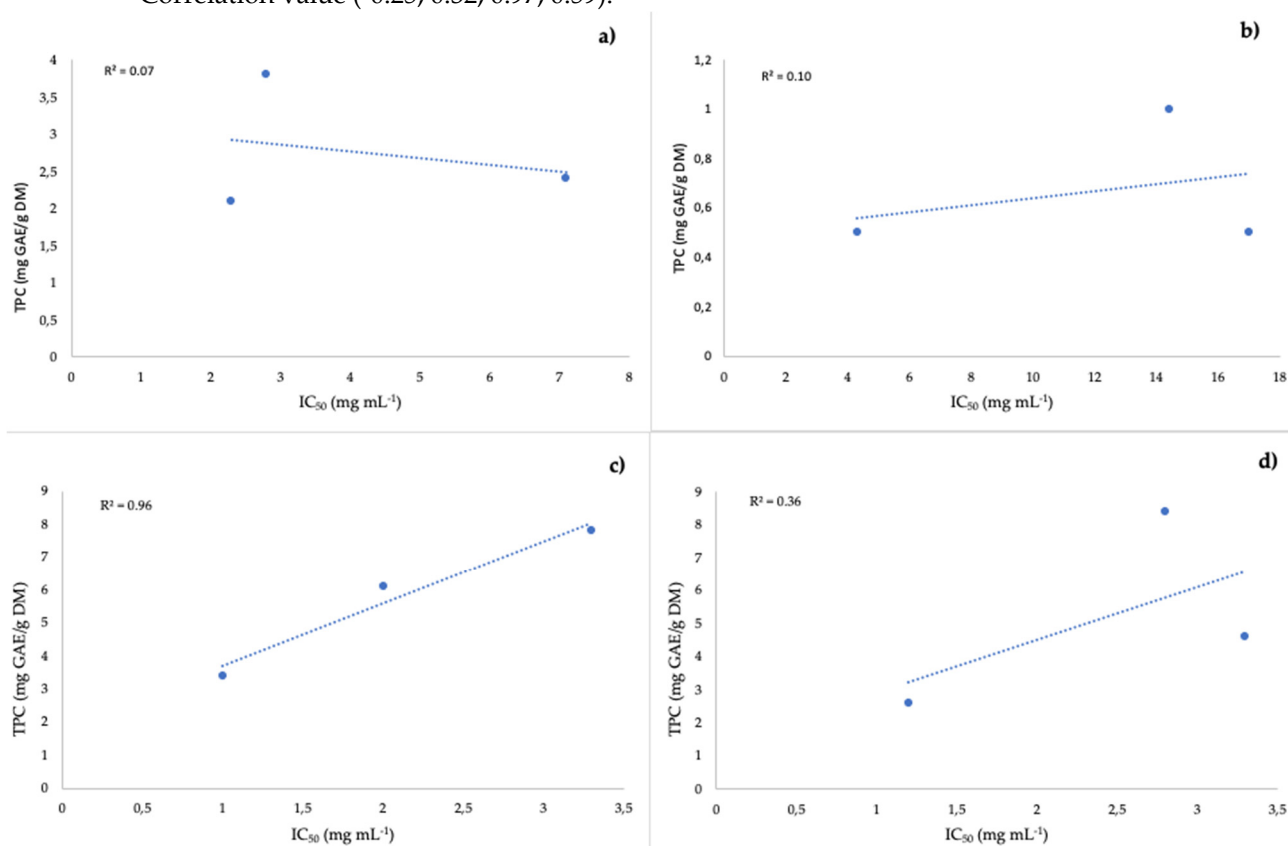

The correlation between antioxidant activity and total polyphenol content is absent in the case of *B. erectus*, *T. longicaulis* and *F. circummediterranea*. A positive correlation was found between the total polyphenol content and the IC<sub>50</sub> value was found for *F. circummediterranea* (collected from Guardata), indicating that an increase in the total polyphenol content corresponds to a reduction in the antioxidant activity.
